# Supplementary material for: The cAMP phosphodiesterase Prune localizes to the mitochondrial matrix and promotes mtDNA replication by stabilizing TFAM
Source: PubMed Central journal article supplement — EMBO Rep. 2015 Feb 3;16(4):520–7. doi: 10.15252/embr.201439636 (PMC4388618; doi:10.15252/embr.201439636), 2015-02-03

# Source Data Figure S2B

Original

Crop

Pn-mCherry

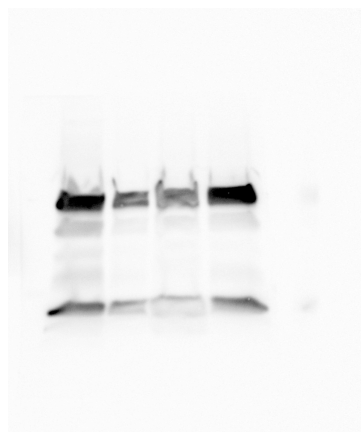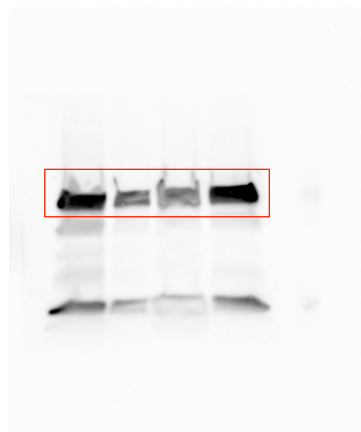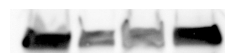

ATP-S

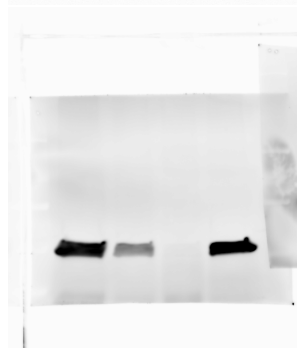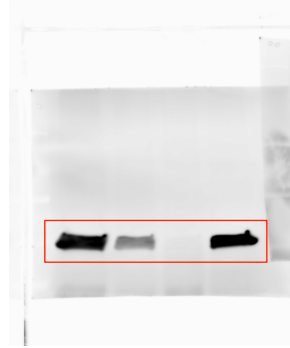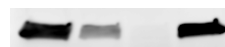

Tubulin

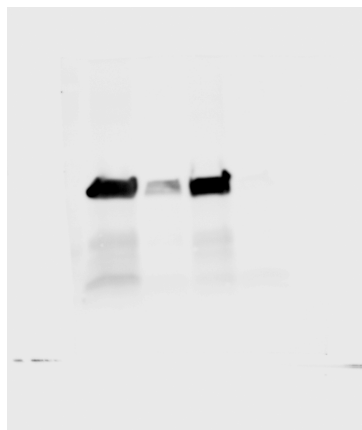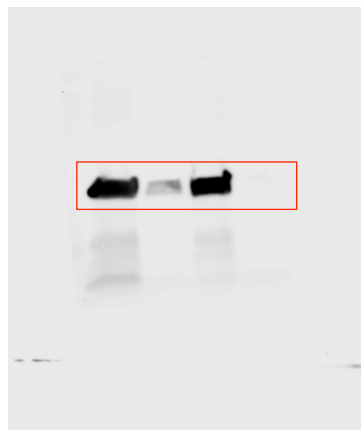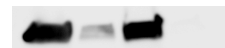

Source Data Figure S3D

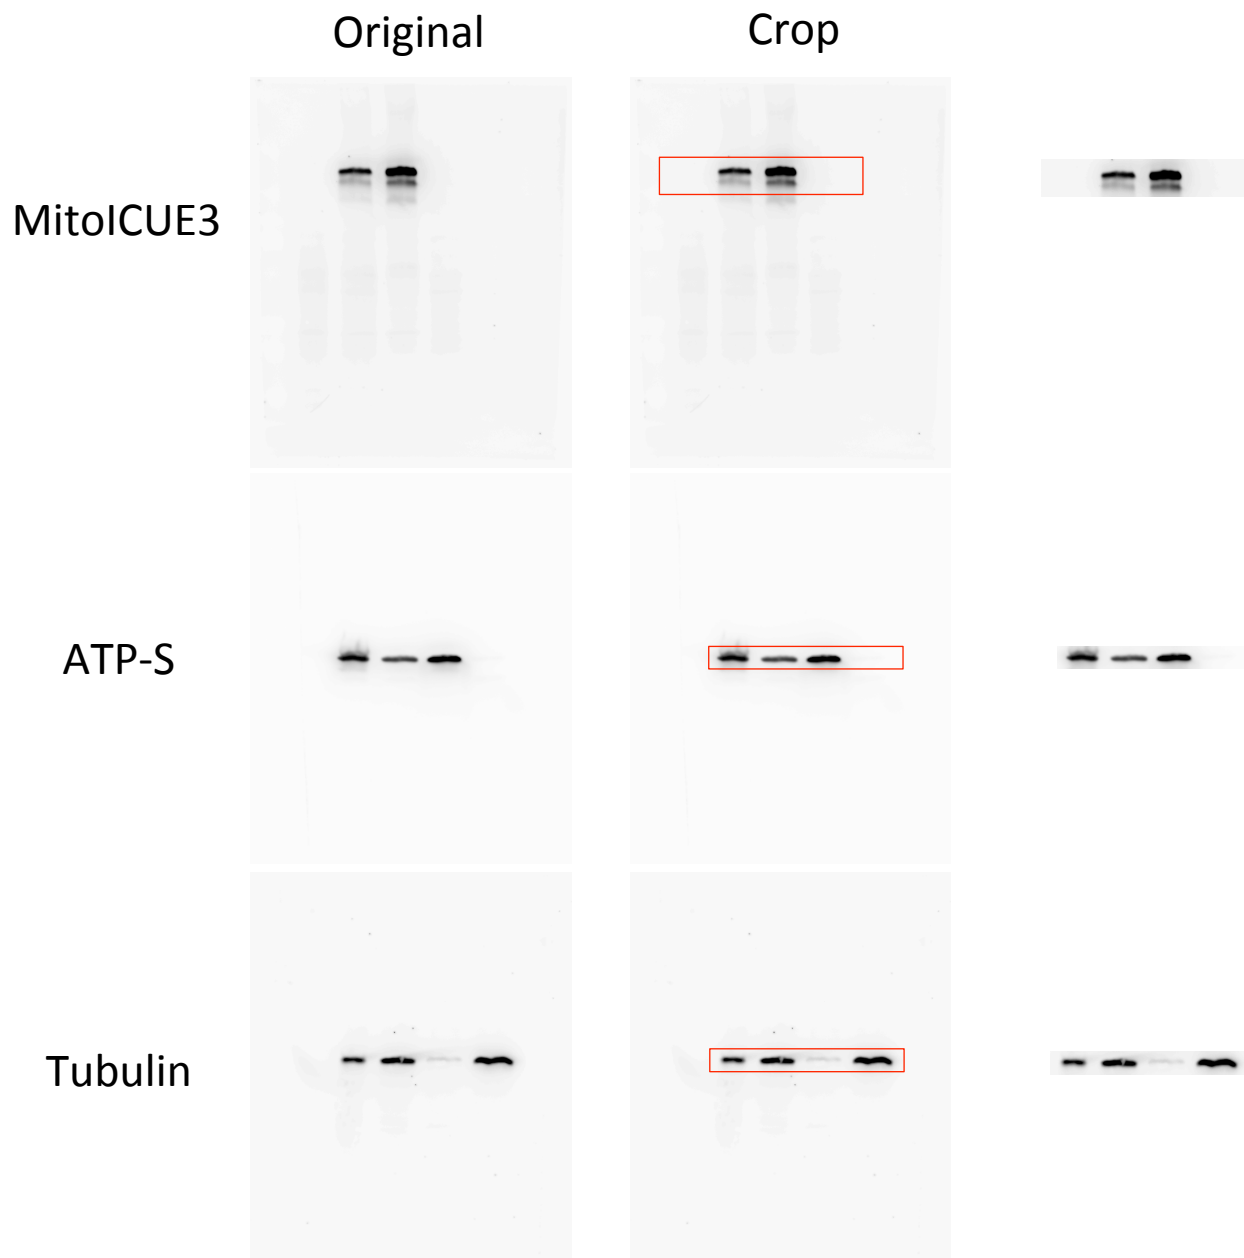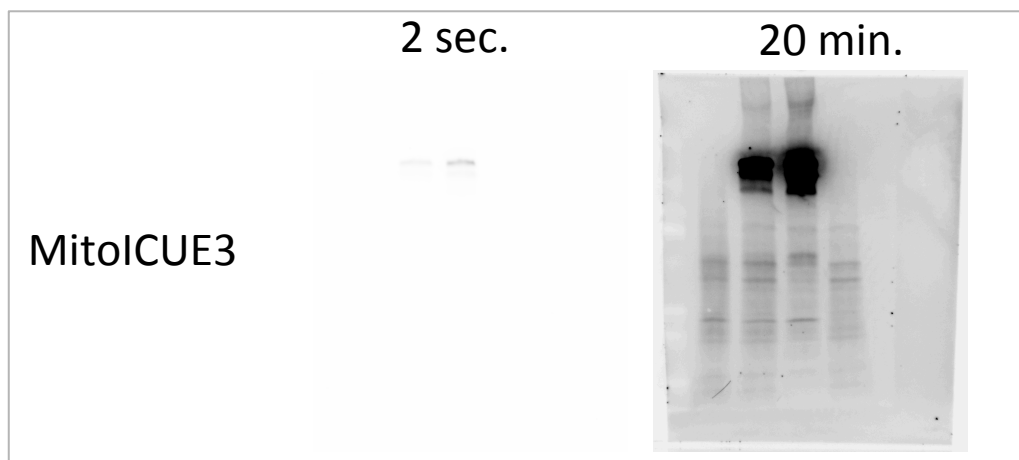

# Source data Figure S5B

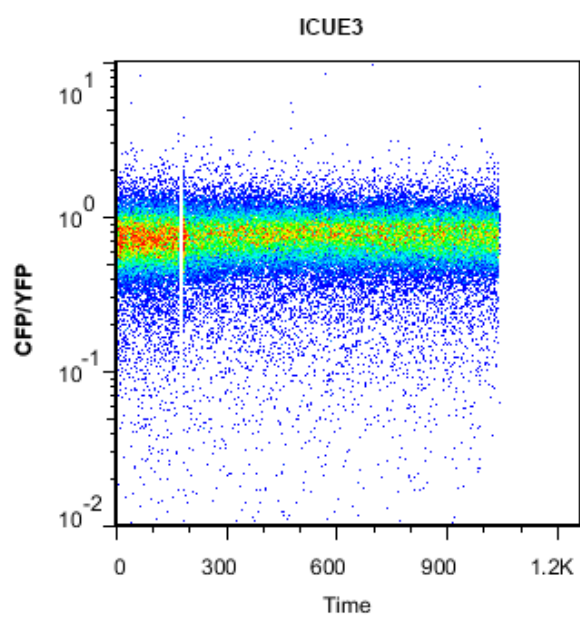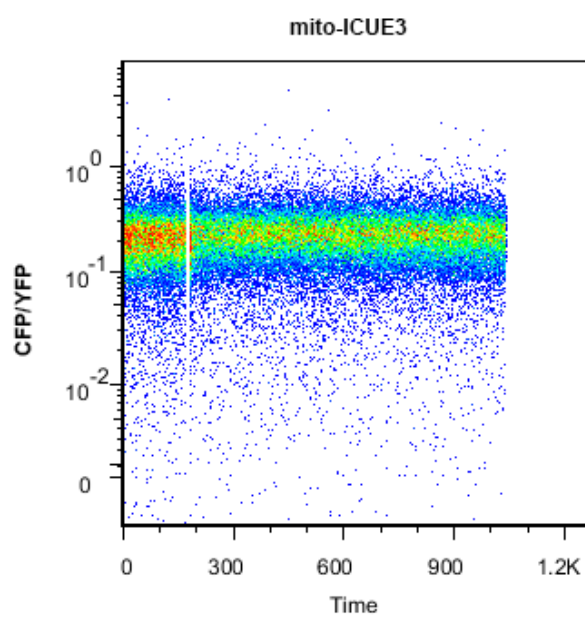

Supplement: embr0016-0520-sd4.pdf [file embr0016-0520-sd4.pdf]
