# Supplementary figures and images for: The cAMP phosphodiesterase Prune localizes to the mitochondrial matrix and promotes mtDNA replication by stabilizing TFAM
Source: PubMed Central journal article supplement — EMBO Rep. 2015 Feb 3;16(4):520–7. doi: 10.15252/embr.201439636 (PMC4388618; doi:10.15252/embr.201439636), 2015-02-03

Figure S1

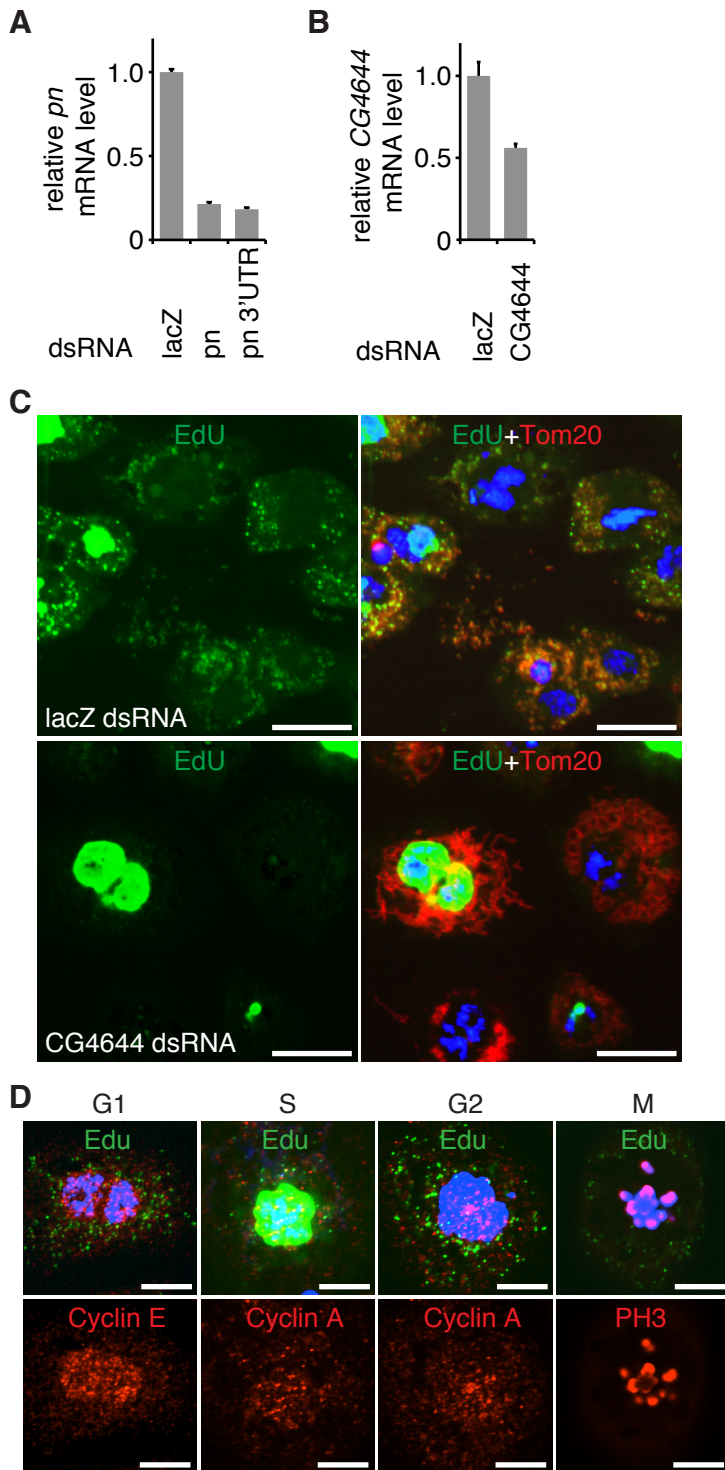

**Figure S2**

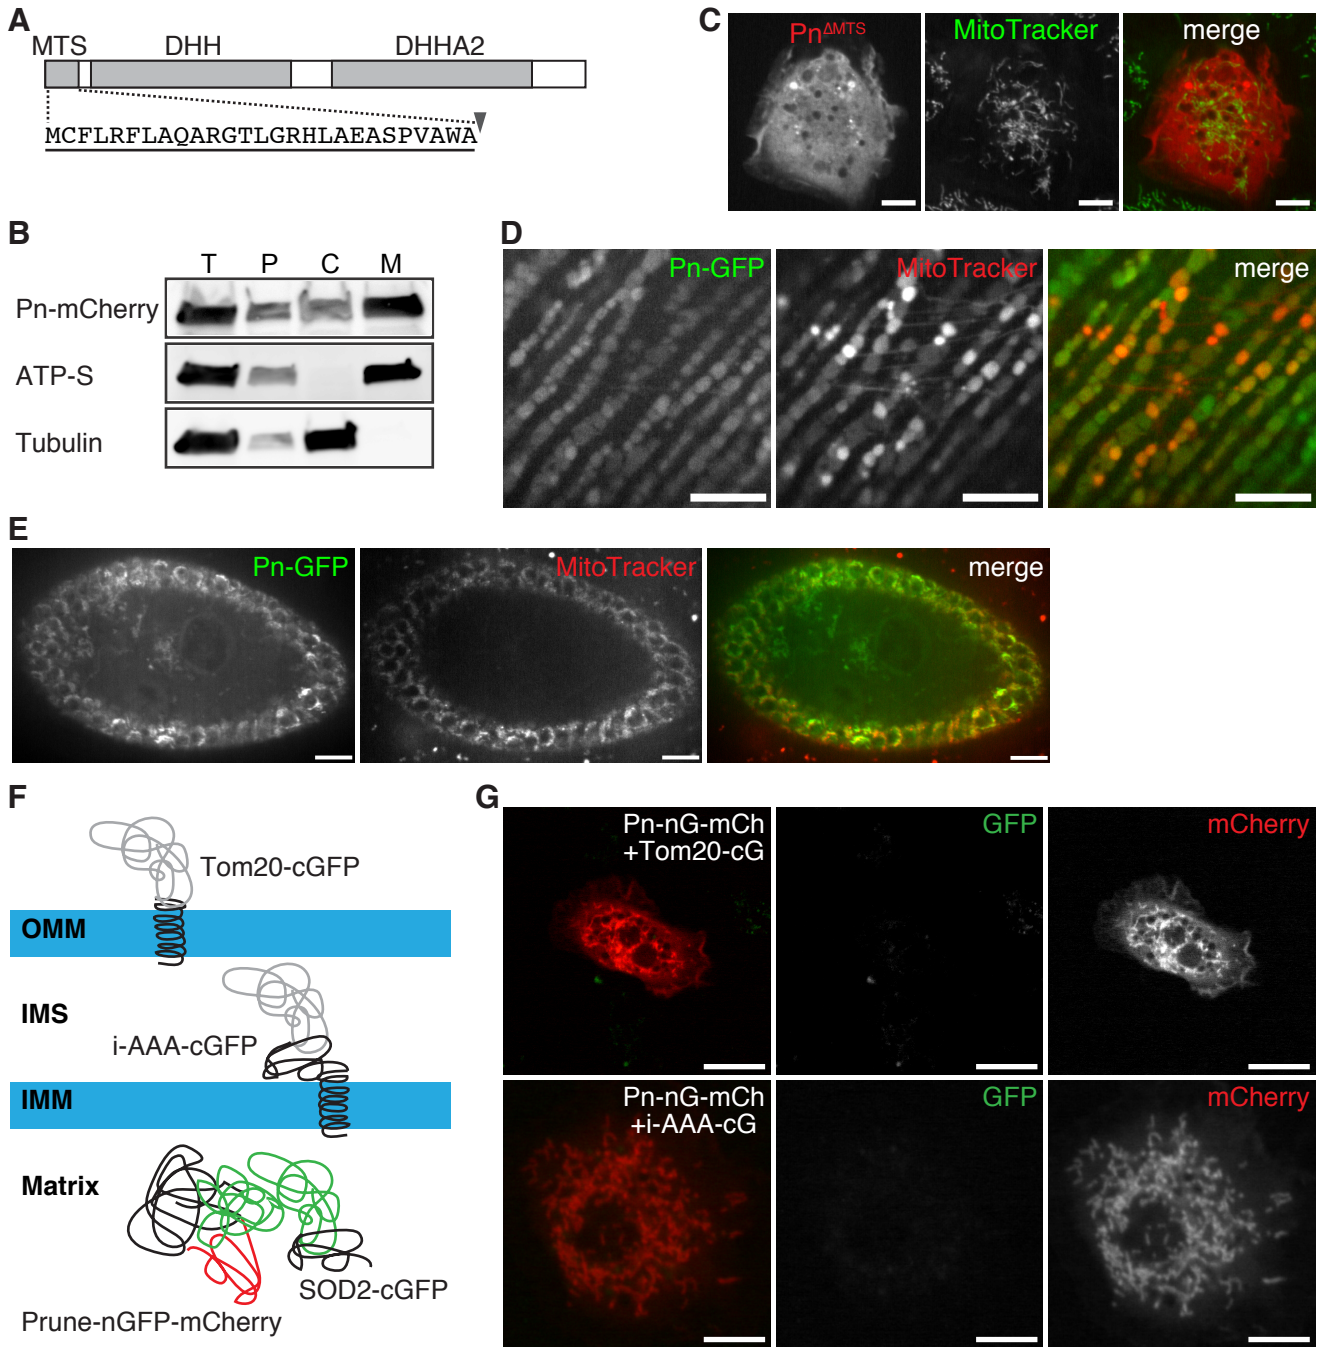

Figure S3

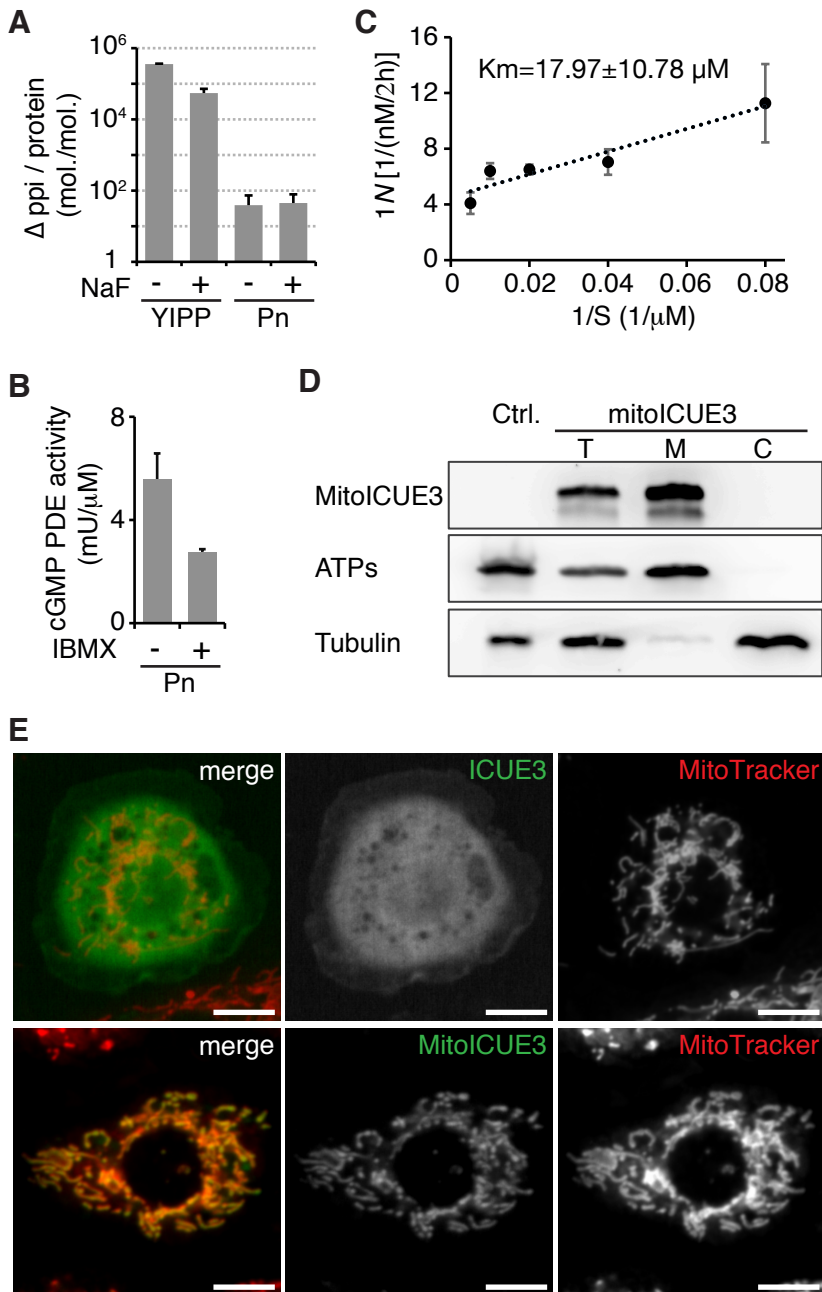

Figure S4

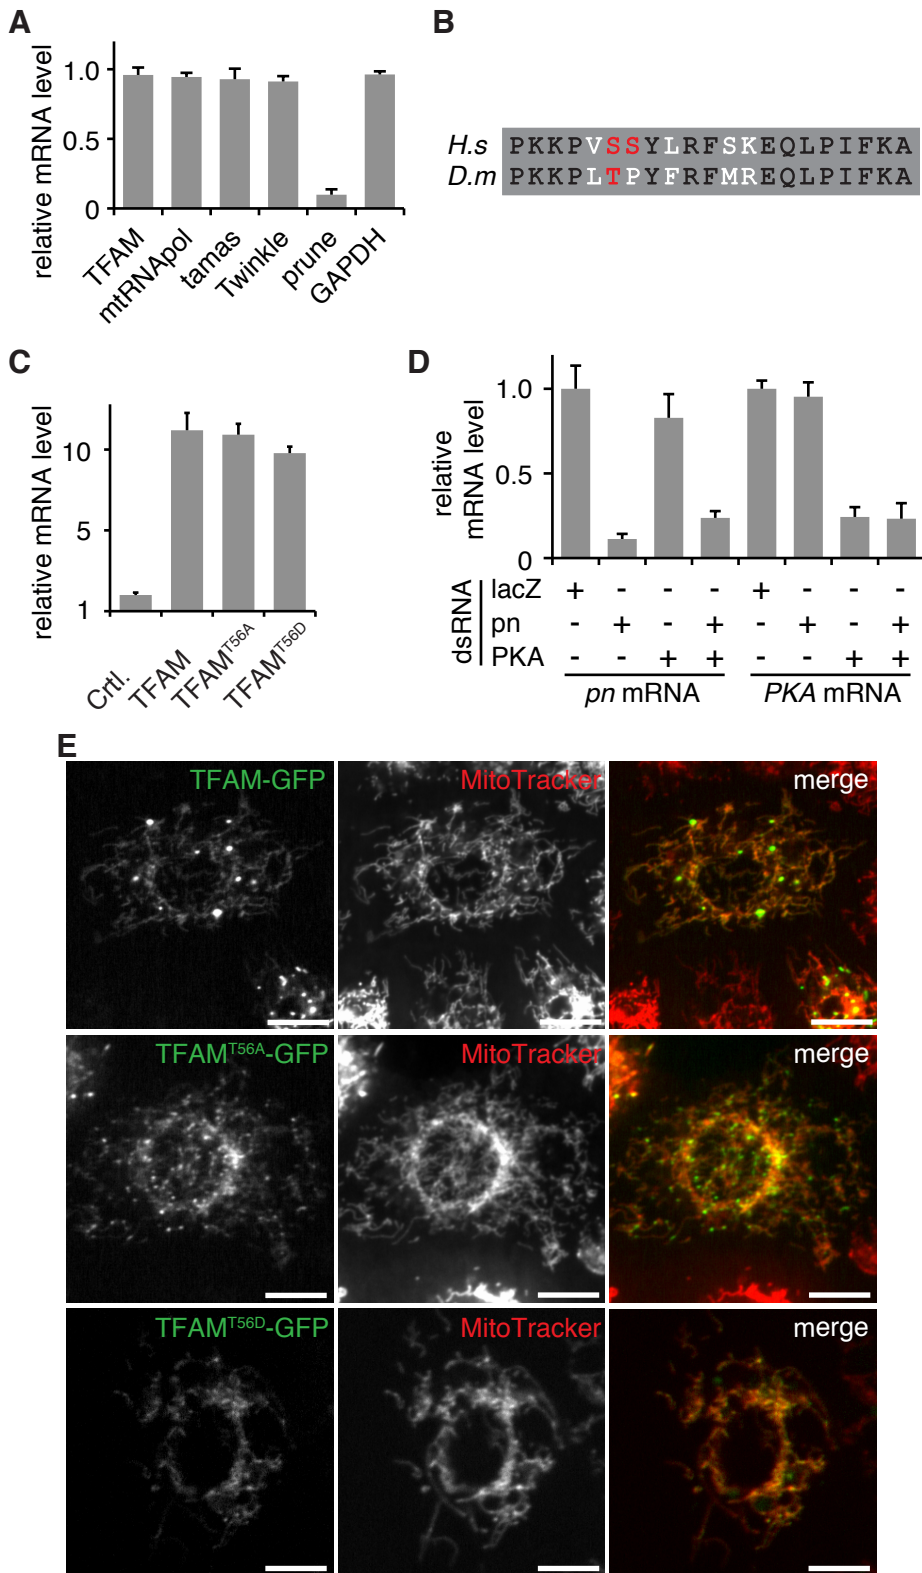

Figure S5

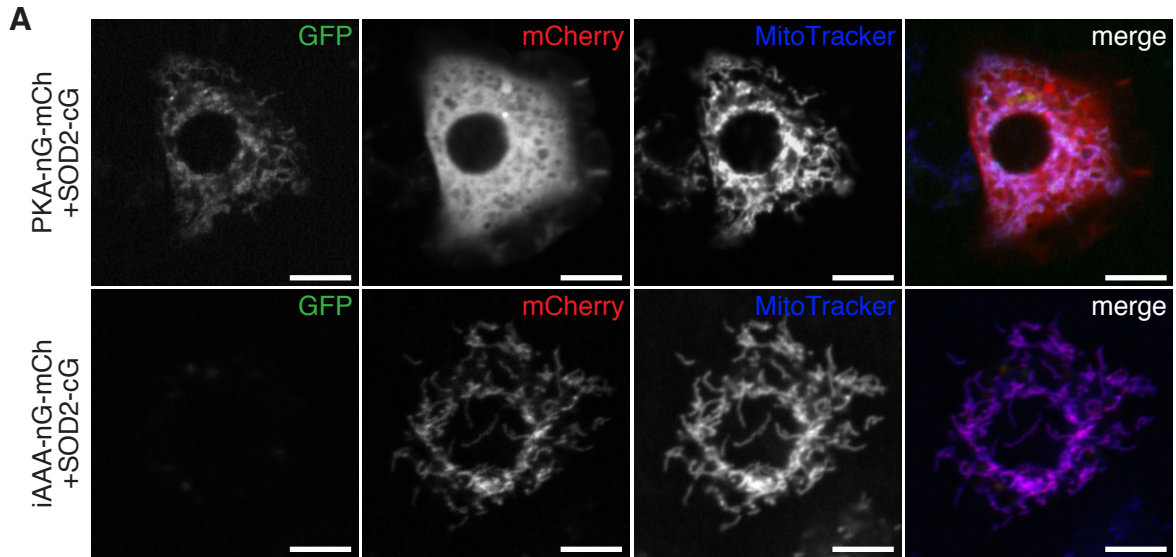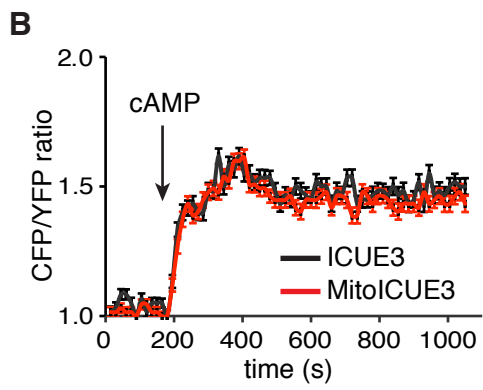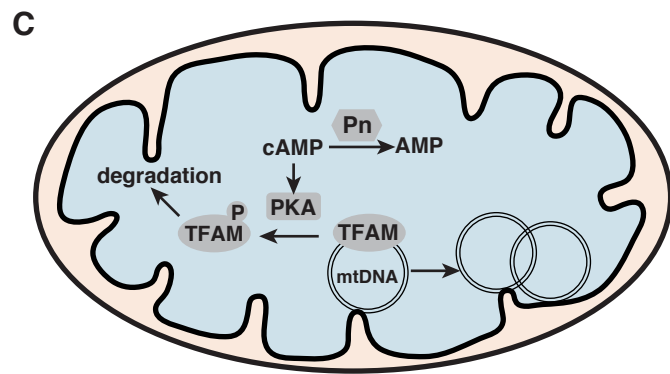

Supplement: embr0016-0520-sd1.pdf [file embr0016-0520-sd1.pdf]

# Source Data Figure 5A

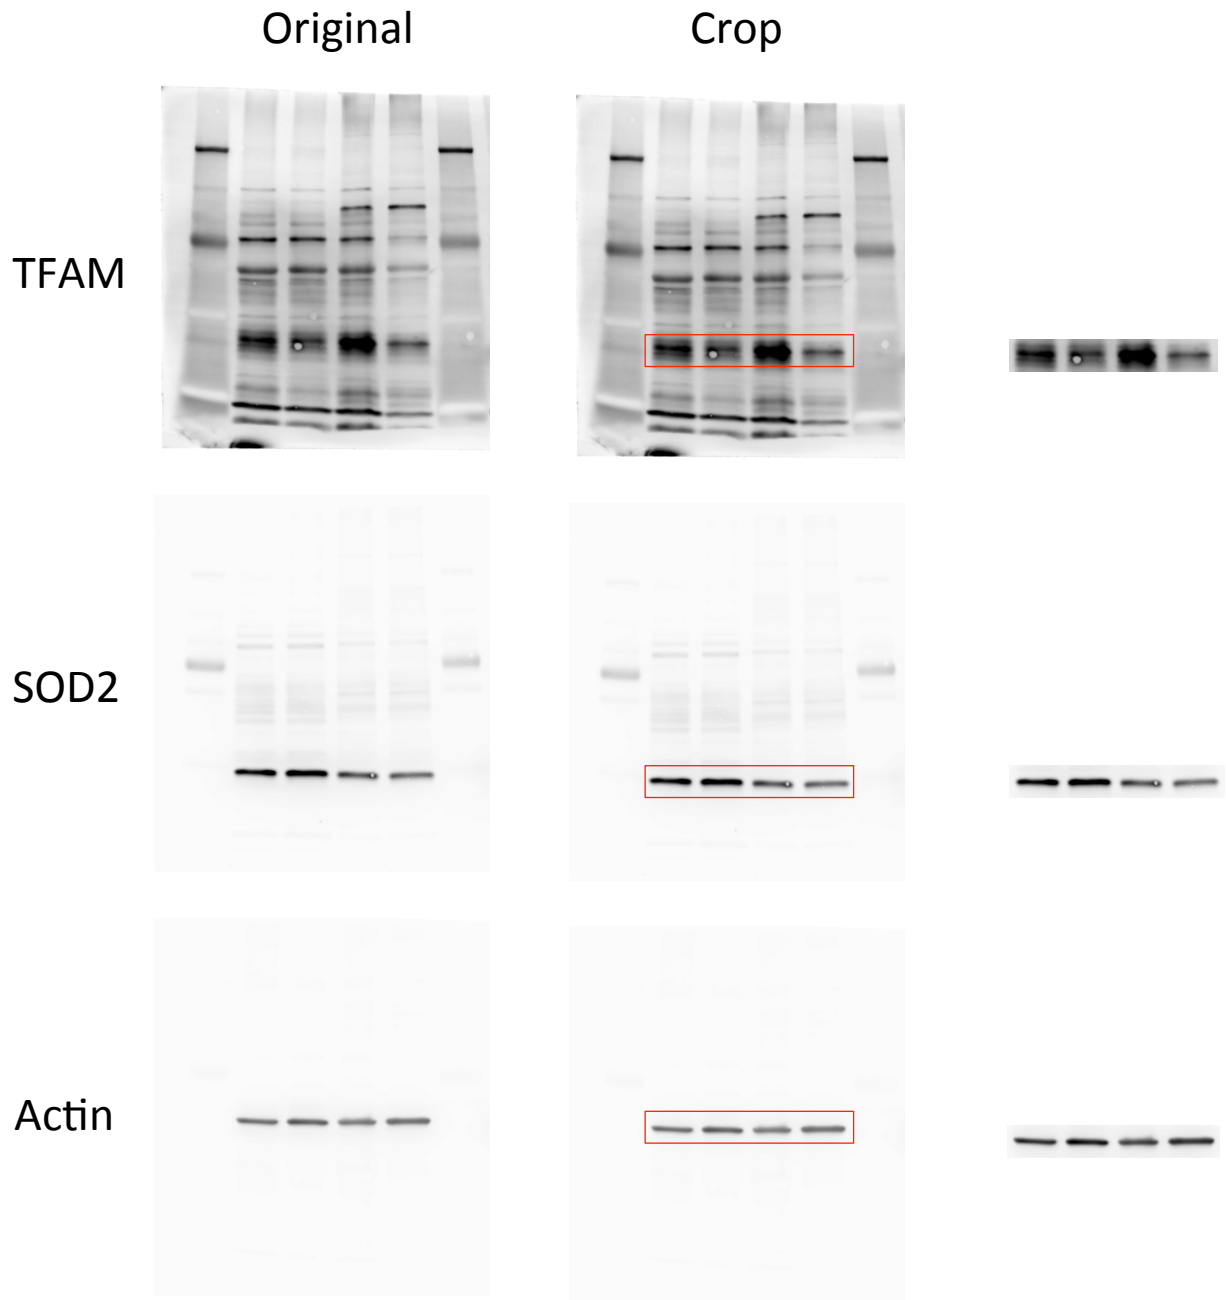

Supplement: embr0016-0520-sd13.pdf [file embr0016-0520-sd13.pdf]

## Source data Figure 2E

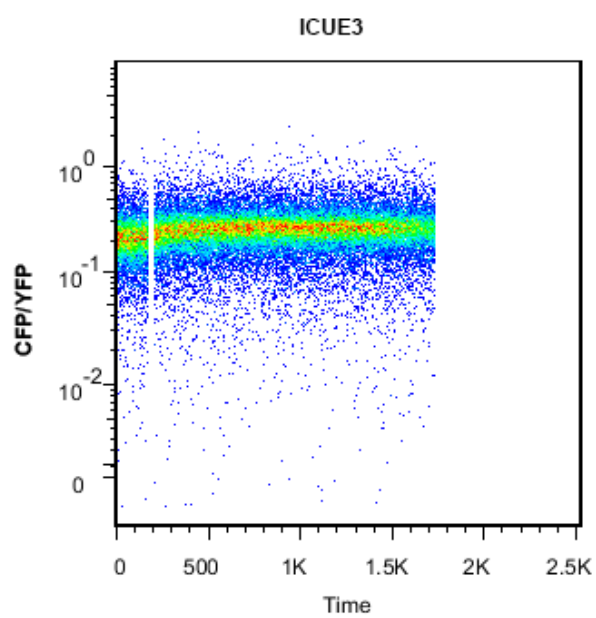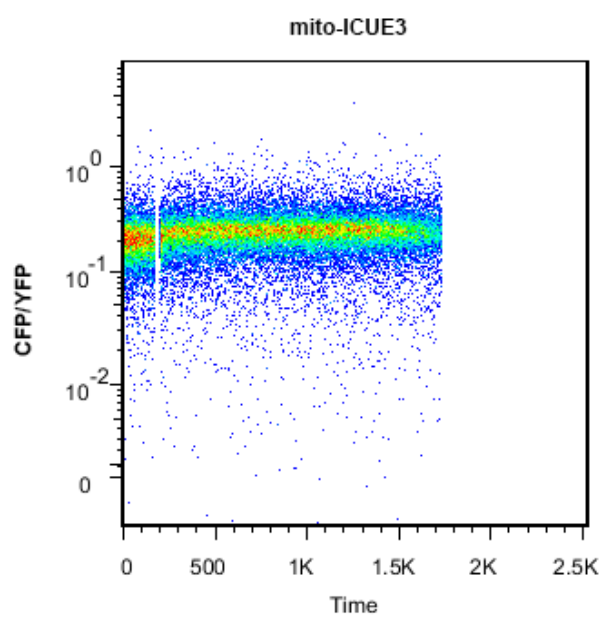

Supplement: embr0016-0520-sd8.pdf [file embr0016-0520-sd8.pdf]

# Source Data Figure 3A

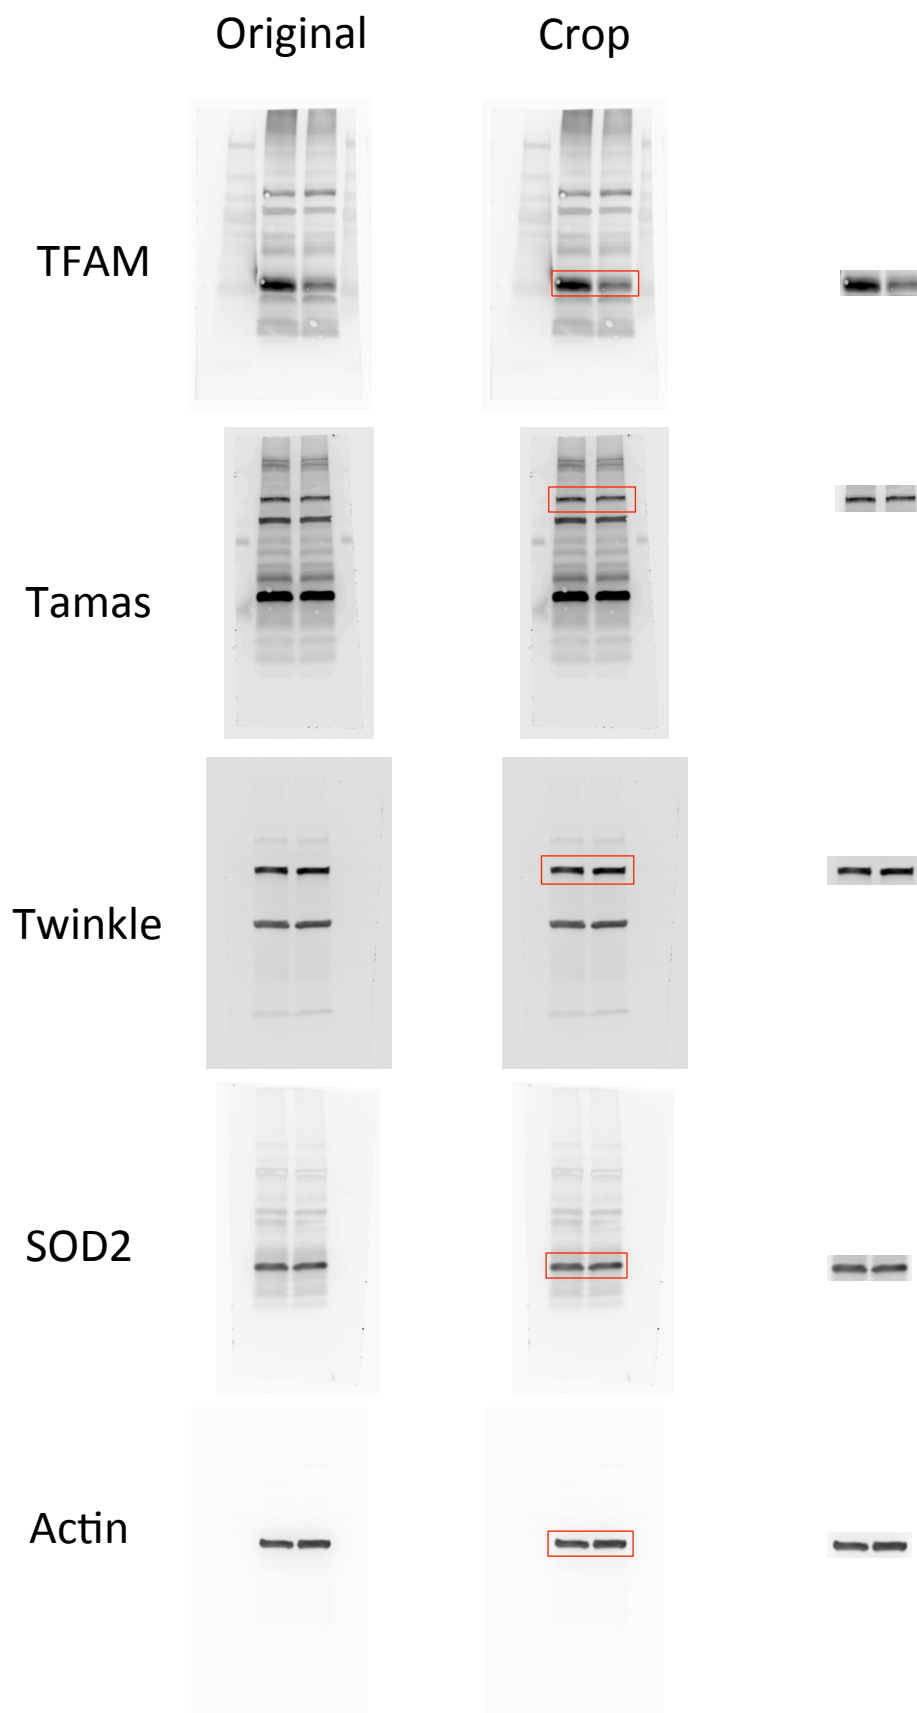

# Source Data Figure 3C

Original

Crop

TFAM

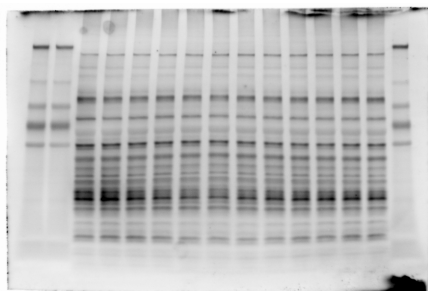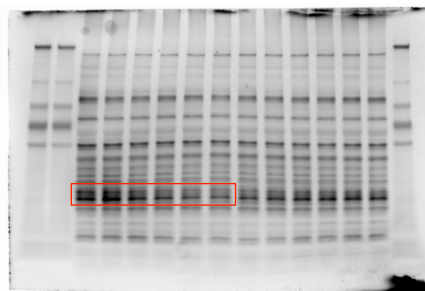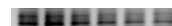

SOD2

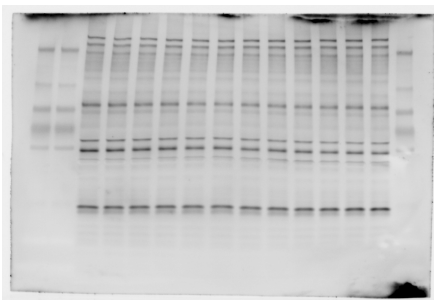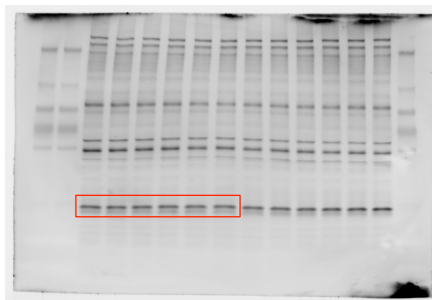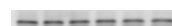

Actin

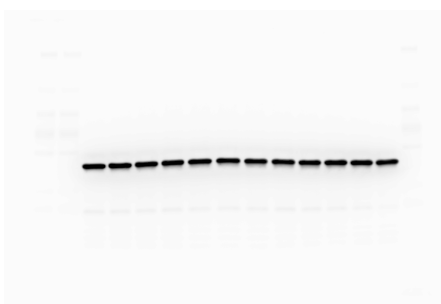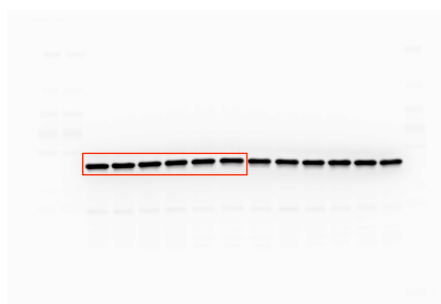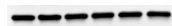

Supplement: embr0016-0520-sd9.pdf [file embr0016-0520-sd9.pdf]
